# Supplementary material for: Colonization of Enteroaggregative Escherichia coli and Shiga toxin-producing Escherichia coli in chickens and humans in southern Vietnam
Source: BMC Microbiol. 2016 Sep 9;16(1):208. doi: 10.1186/s12866-016-0827-z (PMC5017054; doi:10.1186/s12866-016-0827-z)
Supplement: Additional file 1: Table S1. — Patterns of antimicrobial resistance in EAEC and STEC isolated from humans in southern Vietnam. (XLSX 10 kb) [file 12866_2016_827_MOESM1_ESM.xlsx]

## Sheet: Sheet1
Isolate Code	Study Code	Subject	ColonyNumber	Plate	Detected Gene(s)	Resistance pattern
CG15F.A1	CG15F	F	A1	A	aggR	C--AMC----SXT--CN--AMP
CG15F.G1	CG15F	F	G1	G	aggR	C--AMC----SXT--CN--AMP
CG15F.G2	CG15F	F	G2	G	aggR	C------SXT--CN--AMP
CG37R.G1	CG37R	R	G1	G	aggR/ fliCH4	C-CAZ-AMC-CRO--TE---CN-CIP-AMP
CG37R.N1	CG37R	R	N1	N	aggR/ fliCH4	-CAZ--CRO---SXT---CIP-AMP
CG41F.A1	CG41F	F	A1	A	aggR	-----TE-----AMP
CG41F.G1	CG41F	F	G1	G	aggR	C--AMC---TE-SXT--CN--AMP
CG62R.C2	CG62R	R	C2	C	aggR	-CAZ-AMC-CRO--TE-SXT--CN-CIP-AMP
CG62R.A2	CG62R	R	A2	A	aggR	-CAZ-AMC-CRO--TE-SXT--CN-CIP-AMP
CG62R.N2	CG62R	R	N2	N	aggR	-CAZ--CRO--TE-SXT--CN-CIP-AMP
CG62R.N1	CG62R	R	N1	N	aggR	-CAZ-AMC-CRO--TE-SXT--CN-CIP-AMP
CG62R.G2	CG62R	R	G2	G	aggR	-CAZ--CRO--TE-SXT--CN-CIP-AMP
CG62R.G1	CG62R	R	G1	G	aggR	-CAZ--CRO--TE-SXT--CN-CIP-AMP
CG67R.G2	CG67R	R	G2	G	aggR	--AMC-CRO---SXT--CN--AMP
CG67R.G1	CG67R	R	G1	G	aggR	---CRO--TE-SXT--CN--AMP
CG67R.C2	CG67R	R	C2	C	aggR	---CRO--TE-SXT--CN--AMP
CG67R.C1	CG67R	R	C1	C	aggR	-CAZ--CRO--TE-SXT--CN--AMP
CT20F.A1	CT20F	F	A1	A	Wzxo104	C-CAZ-AMC-CRO--TE-----AMP
CT37R.A3	CT37R	R	A3	A	aggR	-----TE-----AMP
CT55F.G1	CT55F	F	G1	G	aggR	C-CAZ--CRO--TE-SXT--CN--AMP
CT55F.C2	CT55F	F	C2	C	aggR	C-CAZ-AMC-CRO--TE-SXT--CN--AMP
CT55F.C1	CT55F	F	C1	C	aggR	C---CRO--TE-SXT--CN--AMP
CT55F.A2	CT55F	F	A2	A	aggR	C---CRO--TE-SXT--CN--AMP
CT58F.N2	CT58F	F	N2	N	aggR	C--AMC----SXT--CN--AMP
CT61F.G2	CT61F	F	G2	G	aggR	C--AMC---TE-SXT--CN--AMP
CT61F.G1	CT61F	F	G1	G	aggR	C--AMC---TE-SXT--CN--AMP
MT12R.A2	MT12R	R	A2	A	aggR	-----TE-SXT----AMP
MT13R.N2	MT13R	R	N2	N	aggR	-CAZ-AMC-CRO--TE-SXT-AK--CIP-AMP
MT15F.N2	MT15F	F	N2	N	stx1	C-----TE-SXT---CIP-AMP
MT43R.C2	MT43R	R	C2	C	aggR	C-CAZ-AMC-CRO--TE-SXT---CIP-AMP
MT51U.N1	MT51U	U	N1	N	aggR	--AMC---TE-SXT----AMP
MT51U.A3	MT51U	U	A3	A	aggR	--AMC---TE-SXT----AMP
MT65F.C1	MT65F	F	C1	C	aggR	C-CAZ--CRO-------AMP
MT65F.A2	MT65F	F	A2	A	aggR	-CAZ-AMC-CRO-------AMP
MT68F.G1	MT68F	F	G1	G	aggR	-CAZ-AMC-CRO---SXT--CN--AMP
MT68F.C1	MT68F	F	C1	C	aggR	-CAZ-AMC-CRO---SXT--CN--AMP
